# Supplementary material for: Pesticides in the atmospheric environment: an overview on their determination methodologies
Source: Royal Society of Chemistry journal article supplement (doi:10.1039/c8ay01327f), 2018-01-01
Supplement: c8ay01327f1.pdf [file c8ay01327f1.pdf]

**SUPPLEMENTARY MATERIAL**

**Pesticides in the atmospheric environment: An overview on their determination methodologies**

Madson M. Nascimento<sup>a,b,c</sup>, Gisele O. da Rocha<sup>a,b,c</sup>, Jailson B. de Andrade<sup>a,b,c\*</sup>

a – Universidade Federal da Bahia, Instituto de Química, Campus de Ondina, 40170-115 Salvador, BA, Brazil

b – Instituto Nacional de Ciência e Tecnologia em Energia e Ambiente - INCT, Universidade Federal da Bahia, 40170-115 Salvador, BA, Brazil

c - Centro Interdisciplinar em Energia e Ambiente- CIEnAm, Universidade Federal da Bahia, 40170-115 Salvador, BA, Brazil.

\*Corresponding author. Fax: +55 71 3283 6821.

E-mail address: jailsondeandrade@gmail.com (J.B. de Andrade).

Table S1. Classification and physical-chemical properties of some pesticides [1,2].

| Pesticide    | Chemical structure                                                                  | Melting point (°C) | Boiling point (°C) | Henry's Law Constant (Pa m <sup>3</sup> mol <sup>-1</sup> ) | Vapour pressure (mPa)   | Log Kow | Half-life (soil degradation)/persistence |
|--------------|-------------------------------------------------------------------------------------|--------------------|--------------------|-------------------------------------------------------------|-------------------------|---------|------------------------------------------|
| Aldrin       | 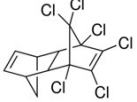   | 104                | 145                | 1.72 X 10 <sup>1</sup>                                      | 8.6                     | 6.5     | 365 days/very persistent                 |
| Azoxystrobin |    | 116                | 360                | 7.40 x 10 <sup>-9</sup>                                     | 1.10 x 10 <sup>-7</sup> | 2.5     | 180.7 days/moderately persistent         |
| Bifenthrin   |    | 79.6               | DBB <sup>a</sup>   | 7.74 x 10 <sup>-5</sup>                                     | 1.78 x 10 <sup>-2</sup> | 6.6     | 86.8 days/moderately persistent          |
| Carbofuran   |    | 153.1              | 254                | 5.00 x 10 <sup>-5</sup>                                     | 8.0 x 10 <sup>-2</sup>  | 1.8     | 14 days/non-persistent                   |
| Carbendazim  |    | 305                | DBB <sup>a</sup>   | 9.00 x 10 <sup>-2</sup>                                     | 3.60 x 10 <sup>-3</sup> | 1.48    | 22 days/non persistent                   |
| Chlorpyrifos |    | 42                 | DBB <sup>a</sup>   | 0.478                                                       | 1.43                    | 4.7     | 27.6 days/non-persistent                 |
| Demeton      |   | -25                | 125                | 0.387                                                       | 3.26                    | 3.21    | Not informed                             |
| 2,4'-DDT     |  | 109                | 185                | 8.43 x 10 <sup>-1</sup>                                     | 2.5 x 10 <sup>-2</sup>  | 6.91    | 6200 days/very persistent                |
| Diazinon     |  | Not informed       | DBB <sup>a</sup>   | 6.09x10 <sup>-2</sup>                                       | 11.97                   | 1.14    | 18.4 days/non-persistent                 |
| Dieldrin     |  | 177                | 385                | 6.50 x 10 <sup>-02</sup>                                    | 2.4 x 10 <sup>-2</sup>  | 3.7     | 1400 days/very persistent                |

|               |                                                                                     |              |                  |                       |                       |      |                                 |
|---------------|-------------------------------------------------------------------------------------|--------------|------------------|-----------------------|-----------------------|------|---------------------------------|
| Difenoconazol | 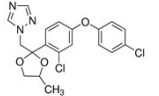   | 82.5         | 101              | $9.0 \times 10^{-07}$ | $3.33 \times 10^{-5}$ | 4.36 | 85 days/moderately persistent   |
| Disulfoton    |    | -25          | Not informed     | $1.60 \times 10^{-1}$ | 7.2                   | 3.95 | 30 days/moderately persistent   |
| Endrin        |    | 200          | Not informed     | $1.48 \times 10^{-1}$ | $2.0 \times 10^{-7}$  | 3.2  | 4300 days/very persistent       |
| Ethion        |    | -12          | 165              | $3.85 \times 10^{-2}$ | 0.2                   | 5.07 | 90 days/moderately persistent   |
| Fenthion      |    | 7.5          | 90               | $2.40 \times 10^{-2}$ | 0.37                  | 4.84 | 22 days/non-persistent          |
| Heptachlor    |    | 95           | 135              | $3.53 \times 10^2$    | 53                    | 5.44 | 250 days/persistent             |
| Malathion     |    | -20          | DBB <sup>a</sup> | $1.00 \times 10^{-3}$ | 3.1                   | 2.75 | 1 day/non-persistent            |
| Methoxychlor  |    | 87           | Not informed     | $2.00 \times 10^{-2}$ | $8.0 \times 10^{-2}$  | 5.83 | 120 days/persistent             |
| Parathion     |    | 6.1          | 375              | $3.02 \times 10^{-2}$ | 0.89                  | 3.83 | 49 days/moderately persistent   |
| Permethrin    |   | 34.5         | 200              | $1.89 \times 10^{-1}$ | $2.0 \times 10^{-3}$  | 6.1  | 42 days/moderately persistent   |
| Sulfotep      |  | Not informed | Not informed     | $4.50 \times 10^{-1}$ | 14                    | 3.99 | 28 days/non-persistent          |
| Tebuconazole  |  | 105          | DBB <sup>a</sup> | $1.00 \times 10^{-5}$ | $1.30 \times 10^{-3}$ | 3.7  | 47.1 days/moderately persistent |
| λ-Cyhalothrin |  | 49.2         | DBB <sup>a</sup> | $2.00 \times 10^{-2}$ | $2.0 \times 10^{-4}$  | 5.5  | 175/persistent                  |
| Endosulfan    |  | 80           | Not informed     | 1.48                  | 0.83                  | 4.75 | 86/moderately persistent        |

---

Hexachlorocyclohexane

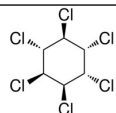

Not informed

Not informed

Not informed

Not informed

Not informed

Not informed

---

<sup>a</sup>DBB: decompose before boiling point.

## REFERENCES

[1] International Union of Pure and Applied Chemistry (IUPAC). Global available of information on agrochemicals. Available in: <<https://sitem.herts.ac.uk/aeru/iupac/Reports/276.htm>>. Accessed in: 29 mai 2018.

[2] Sigma Aldrich. Available in: <<https://www.sigmaaldrich.com/brazil.html>>. Accessed in: 29 mai 2018.
